# Supplementary material for: MOF-Derived Co3O4 Polyhedrons as Efficient Polysulfides Barrier on Polyimide Separators for High Temperature Lithium–Sulfur Batteries
Source: MDPI journal article supplement (doi:10.3390/nano9111574), 2019-11-06
Supplement: s1 [file s1]

# MOF-Derived $\text{Co}_3\text{O}_4$ Polyhedrons as Efficient Polysulfides Barrier on Polyimide Separators for High Temperature Lithium–sulfur Batteries

Zhenfang Zhou <sup>1</sup>, Yue Li <sup>1</sup>, Tingting Fang <sup>1</sup>, Yufeng Zhao <sup>1,2,\*</sup>, Qingjie Wang <sup>3</sup>, Jiujuun Zhang <sup>2</sup> and Zhongfu Zhou <sup>1,4,\*</sup>

<sup>1</sup> School of Materials Science and Engineering, Shanghai University, Shanghai 200444, China; [zzf890225@163.com](mailto:zzf890225@163.com) (Z.Z.); [liyuejanewatson@163.com](mailto:liyuejanewatson@163.com) (Y.L.); [ftt550627949@sina.com](mailto:ftt550627949@sina.com) (T.F.)

<sup>2</sup> Institute for Sustainable Energy, College of Science, Shanghai University, Shanghai 200444, China; [jiujuun.zhang@i.shu.edu.cn](mailto:jiujuun.zhang@i.shu.edu.cn)

<sup>3</sup> State Key Laboratory of Advanced Chemical Power Sources, Guizhou Meiling Power Sources Co. Ltd., Zunyi, Guizhou 563003, China; [wqj3401@163.com](mailto:wqj3401@163.com)

<sup>4</sup> Department of Physics, Aberystwyth University, Aberystwyth SY23 3BZ, UK

\* Correspondence: [yufengzhao@ysu.edu.cn](mailto:yufengzhao@ysu.edu.cn) (Y.Z.); [z.zhou@shu.edu.cn](mailto:z.zhou@shu.edu.cn) (Z.Z.)

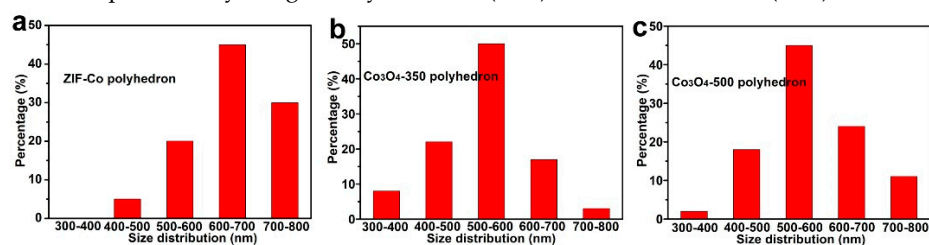

**Figure S1.** The size distribution of the ZIF-Co polyhedron (a), the  $\text{Co}_3\text{O}_4$ -350 polyhedron (b), and the  $\text{Co}_3\text{O}_4$ -500 polyhedron (c).

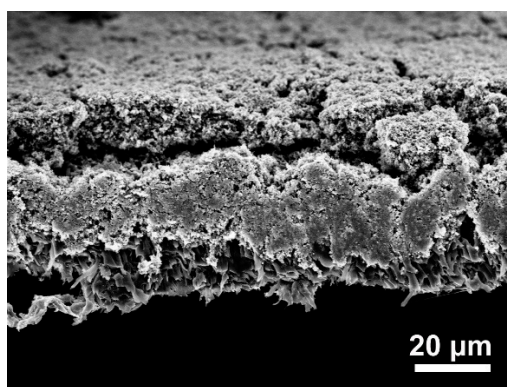

**Figure S2.** Typical cross-section SEM image of the  $\text{Co}_3\text{O}_4$ -350/PI/LLZO separator.

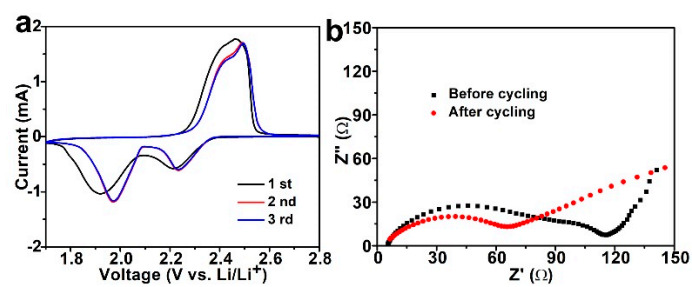

**Figure S3.** Typical CV curves and Nyquist plots of Li-S cell using the pristine PI separator.

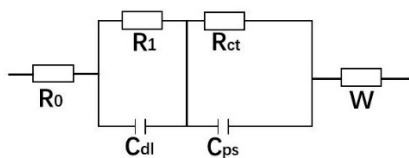

**Figure S4.** The equivalent electric circuit from the EIS fitting results.
